# Supplementary material for: Syntenator: Multiple gene order alignments with a gene-specific scoring function
Source: Springer Nature journal article supplement (doi:10.1186/1748-7188-3-14), 2008-11-06
Supplement: Additional file 1 [file 1748-7188-3-14-s1.pdf]

**Table 2 - Resolving EnsEMBL 1:many and many:many orthologs**

| EnsEMBL 1:many orthologs    |          | Genome A  |           | Genome B          |           | Genome B  |                   | Genome B  |           | best hit heuristic |          |
|-----------------------------|----------|-----------|-----------|-------------------|-----------|-----------|-------------------|-----------|-----------|--------------------|----------|
| Genome A                    | Genome B | 1:many    | resolved  | local duplication | 1:many    | resolved  | local duplication | 1:many    | resolved  | local duplication  | resolved |
| Human                       | Mouse    | 543       | 359 (67%) | 110 (20%)         | 307       | 200 (65%) | 49 (16%)          | 307       | 200 (65%) | 49 (16%)           | 77%      |
| Human                       | Rat      | 552       | 374 (68%) | 88 (16%)          | 301       | 189 (63%) | 45 (15%)          | 301       | 189 (63%) | 45 (15%)           | 77%      |
| Human                       | Dog      | 210       | 157 (75%) | 17 (8%)           | 364       | 231 (64%) | 71 (20%)          | 364       | 231 (64%) | 71 (20%)           | 77%      |
| Mouse                       | Rat      | 505       | 345 (68%) | 80 (16%)          | 538       | 332 (62%) | 107 (20%)         | 538       | 332 (62%) | 107 (20%)          | 77%      |
| Mouse                       | Dog      | 171       | 126 (74%) | 16 (9%)           | 562       | 371 (66%) | 104 (19%)         | 562       | 371 (66%) | 104 (19%)          | 78%      |
| Rat                         | Dog      | 573       | 395 (69%) | 88 (15%)          | 174       | 122 (70%) | 15 (9%)           | 174       | 122 (70%) | 15 (9%)            | 81%      |
| EnsEMBL many:many orthologs |          | Genome A  |           | Genome B          |           | Genome B  |                   | Genome B  |           | best hit heuristic |          |
| Genome A                    | Genome B | many:many | resolved  | local duplication | many:many | resolved  | local duplication | many:many | resolved  | local duplication  | resolved |
| Human                       | Mouse    | 471       | 102 (22%) | 144 (30%)         | 586       | 96 (16%)  | 138 (22%)         | 586       | 96 (16%)  | 138 (22%)          | 54%      |
| Human                       | Rat      | 422       | 88 (21%)  | 119 (28%)         | 569       | 83 (15%)  | 112 (20%)         | 569       | 83 (15%)  | 112 (20%)          | 54%      |
| Human                       | Dog      | 203       | 55 (27%)  | 30 (15%)          | 194       | 47 (24%)  | 33 (17%)          | 194       | 47 (24%)  | 33 (17%)           | 59%      |
| Mouse                       | Rat      | 828       | 181 (22%) | 176 (21%)         | 769       | 161 (21%) | 187 (24%)         | 769       | 161 (21%) | 187 (24%)          | 49%      |
| Mouse                       | Dog      | 217       | 53 (24%)  | 36 (12%)          | 184       | 51 (28%)  | 37 (20%)          | 184       | 51 (28%)  | 37 (20%)           | 53%      |
| Rat                         | Dog      | 428       | 46 (11%)  | 29 (7%)           | 173       | 40 (23%)  | 35 (20%)          | 173       | 40 (23%)  | 35 (20%)           | 62%      |

This table shows ambiguous pairwise orthology relations as defined by EnsEMBL. The first two columns denote the compared genomes. The third column lists the total number of 1:many or many:many relations for the respective genome. Columns labeled with "resolved" show the number of ambiguous relations that could be assigned to a gene pair. Columns labeled with "local duplications" show the number of ambiguous relations due to local gene duplications. We could identify local gene duplications but did not resolve them as a resolution would not be supported by the genomic context. The column for the best-hit heuristic gives the proportion of SYNENATOR resolutions in percentage that are also found by just taking the best BLAST hit of Genome A to Genome B to resolve ambiguities.
